# Supplementary material for: Human embryonic stem cell-derived organoid retinoblastoma reveals a cancerous origin
Source: PubMed Central journal article supplement — Proc Natl Acad Sci U S A. 2020 Dec 14;117(52):33628–38. doi: 10.1073/pnas.2011780117 (PMC7776986; doi:10.1073/pnas.2011780117), 2020-12-14
Supplement: pnas.2011780117.sapp.pdf [file pnas.2011780117.sapp.pdf]

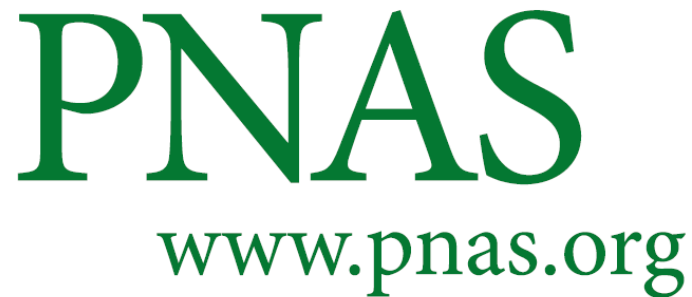

**Supplementary Information for**

**Human Embryonic Stem Cell-Derived Organoid Retinoblastoma Reveals a Cancerous Origin**

Hui Liu, Yan Zhang, You-You Zhang, Yan-Ping Li, Zi-Qi Hua, Chang-Jun Zhang, Kun-Chao Wu, Fulong Yu, Yaru Zhang, Jianzhong Su, and Zi-Bing Jin

Corresponding Author: Zi-Bing Jin. E-mail: [jinzibing@foxmail.com](mailto:jinzibing@foxmail.com) or Jianzhong Su. E-mail: [sujz@wmu.edu.cn](mailto:sujz@wmu.edu.cn).

**This PDF file includes:**

- Supplementary text
- Figures S1 to S8
- Legends for Figures S1 to S8
- Tables S1 to S2
- Legends for Tables S1 to S2
- Legends for Movies S1 to S3

**Other supplementary materials for this manuscript include the following:**

- Movies S1 to S3

## Supplementary Information Text

### SI Materials and Methods

**Cell culture.** Undifferentiated H9 hESCs (WiCell) and their derivatives were cultured as previously described (18). Briefly, cells were grown on Matrigel (Corning, catalog number 356231)-coated plates in TeSR-E8 medium (Stem cell Technologies, 5990) at 37°C in a 5% CO<sub>2</sub> incubator. The culture medium was refreshed every day, and cells were conventionally passaged once a week. Cells were dissociated using 0.5 μM EDTA solution (Gibco, AM9261) and passaged to Matrigel-coated plates in TeSR-E8 supplemented with 10 μM Y-27632 (Selleck, S1049) to maintain pluripotency. Cell morphology was recorded using an inverted fluorescence microscope (ZEISS). Y79 cell lines were obtained from ATCC (HTB-18) and cultured in complete RPMI medium (RPMI 1640 with 20% fetal bovine serum, ATCC) at 37°C in a 5% CO<sub>2</sub> incubator.

**CRISPR/Cas9-mediated genome editing.** The *RB1*<sup>-/-</sup> hESCs was generated using CRISPR/Cas9 technology. Briefly, a sgRNA (forward: CACCGCGGTGGCGGCCGTTTTTCGG, and reverse: AAACCCGAAAAACGGCCGCCACCGC) targeting exon 1 of *RB1* was cloned into pX330-U6-Chimeric\_BB-CBh-hSpCas9-2A-Puro (Addgene, 42230) to generate the CRISPR/Cas9 guide-carrying plasmids (49). hESCs were nucleofected with the constructed guide-carrying plasmids and selected with 2 μg/mL puromycin. Once single, stable transfectants were generated, they were isolated, cultured on Matrigel-coated plates. For detection of positive *RB1*<sup>-/-</sup> clones, the following primers were used: forward: TTTTCTCAGGGGACGTTGAAA, reverse: TCTGATGGACGCTCGCAA.

**Karyotype analysis.** Cells were treated with 0.1 μg/mL colcemid (Gibco, 15212) at 37°C for 2 h, trypsinized, resuspended and incubated in 0.075 M potassium chloride for 15 min at 37°C, fixed with 3:1 methanol:acetic acid, and then dropped onto slides to spread the chromosomes. The chromosomes were visualized by Giemsa (Servicebio) staining.

**Flow cytometry.** Cells were washed with PBS and carefully trypsinized using Accutase, followed by several washes with PBS. Organoids were carefully dissociated into a single-cell suspension using 0.25%

trypsin-EDTA (Gibco, 25200-056). The single cells were resuspended in media and then stained with antibodies in PEB (PBS containing 0.5% BSA and 2 mM EDTA) buffer for 30 min at 4°C. The following antibodies were used: Alexa Fluor 488 Mouse anti-Oct3/4 (1:100, BD Biosciences, 560253), Alexa Fluor 647 Mouse anti-Ki-67(1:100, BD Biosciences, 558615). The cells were filtered through 100 µm nylon mesh and then analyzed for fluorescence by FACSCanto II (Becton Dickinson).

**Cell cycle analysis.** hESCs were carefully dissociated into single-cell suspensions using Accutase solution, washed twice with PBS, and then fixed overnight with cold 70% ethanol. Fixed cells were washed twice with PBS, followed by RNase (100 µg/mL, Sigma, R6148) treatment and propidium iodide (50 µg/mL, Sigma, P4170) staining for 30 min at 37°C. Approximately  $1 \times 10^6$  cells were analyzed using a FACSCanto II (Becton Dickinson) to determine the cell cycle distribution pattern. The percentages of cells in the G1, S, and G2/M phases of the cell cycle were analyzed using ModFit 4.1 (Verity Software House).

**RNA sequencing and analysis.** Total RNA for each sample was isolated with TRIzol reagent and purified using the RNeasy Mini Kit (Qiagen, 74104) according to the manufacturer's instructions. RNA quality and quantity were assessed using a NanoDrop 2000, Agilent 2100 Bioanalyzer and Agilent RNA 6000 Nano Kit (Agilent Technologies, 5067-1511). RNA library construction and RNA Seq were performed by the Annoroad Gene Technology. Sequencing libraries were generated using NEB Next Ultra RNA Library Prep Kit for Illumina (NEB, E7530S), and library clustering was performed using HiSeq PE Cluster Kit v4-cBot-HS (Illumina, PE-401-4001) following the manufacturer's recommendations. After cluster generation, the libraries were sequenced on an Illumina platform and 150 bp paired-end reads were generated. The initial data analysis was performed on BMKCloud (<http://www.biocloud.net/>).

**Single-cell RNA sequencing and analysis.** Organoids were washed with PBS and carefully trypsinized in dissociation solution (2.4 mL 0.25% Trypsin-EDTA supplemented with 1.6 mL Accumax (Stem Cell Technologies, 07921) and 0.05 mg/mL DNase I (Roche, 11284932001) and incubated at 37°C in a 5% CO<sub>2</sub>/40% O<sub>2</sub> incubator for 1 h. The cell suspension was then centrifuged for 5 min at 300 RCF, and the resuspended to prepare a suitable cell concentration of 700~1,200 cells/µL. Cells were loaded onto the 10x Chromium Single Cell Platform as described in the manufacturer's protocol. Samples were processed

(including generation of Gel Bead in Emulsion & Thermal cycling, Post Cycling Cleanup & cDNA Amplification, and Library Preparation & Quantification) following the manufacturer's protocol and sequenced on an Illumina X-ten instrument using 150-base-pair paired-end reads.

Raw 10x Genomics data were processed with the standard Cell Ranger pipeline (v3.0.2). Mapping to the GRCh38 human genome, quality control and read counting of Ensembl genes was performed to generate a single cell gene count matrix. Normalization, variance estimation, dimensionality reduction and clustering of single cells were performed by the monocle R package (v2.10.1). We set monocle to use the negative binomial distribution with fixed variance in downstream statistical tests and estimated size factors and dispersion. Genes with a minimum expression value of 0.5 that were detected in at least 10 cells were retained for subsequent analyses. There were 9,665 and 12,218 cells covering 19,997 genes in hRBO and hRO, respectively. On average, we detected ~1,500 genes per cell.

Principal component analysis was conducted to effectively focus on the more interesting biological variations. We further reduced the data into two dimensions using t-Distributed Stochastic Neighbour Embedding (tSNE). Cells were then grouped by density peak clustering, which is an efficient and highly scalable one-step clustering algorithm. The highly specific cell type marker genes were identified by Seurat (v3.0.2), which performs differential gene expression testing for each cluster and combines the p-values using meta-analysis methods. We explored these marker genes for each cluster and used them to annotate our clusters as specific cell types. Finally, we used Monocle2 to order cells according to a pseudotime. For ordering cells, we chose the differentially expressed genes across clusters ( $q < 0.05$ ) to define a cell's progress. Dimensionality reduction was carried out using the DDRTree method.

**Whole-genome bisulfite sequencing (WGBS).** Genomic DNA was isolated from each sample using a DNeasy Blood & Tissue Kit (QIAGEN, 69504) according to the manufacturer's protocol. DNA was quantified using NanoDrop 2000 and Qubit 2.0 Fluorometer. Genomic DNA (1  $\mu$ g) was used to construct the WGBS library. Bisulfite conversion of genomic DNA was performed using the EZ DNA Methylation-Gold Kit (Zymo Research, D5005) according to the manufacturer's recommendation. Bisulfite-converted

DNA was subjected to processing as described and then sequencing (PE125/PE150) on an Illumina HiSeq platform.

The raw reads of WGBS data were trimmed by trim\_galore (v0.5.0), and then mapped to GRCh38 (human) using Bismark (v0.18.2) with default parameters. We extracted the methylated CpGs with Bismark methylation extractor script. The number of converted and unconverted reads, total coverage and fractional methylation at each individual CpG were reported. Only CpG sites covered by five or more reads were retained for further analysis.

The global analysis of DNA methylation status between hRO and hRBO was performed using SMART2 software, an entropy-based framework used to detect DMRs. To strictly identify high-confidence aberrant methylation associated with Rb pathogenesis, we required that significant DMRs had adjusted p-values less than 0.01 as well as the absolute values of mean methylation differences greater than 0.25.

Differentially methylated genes were visualized using EnhancedVolcano (v1.0.1) (Publication-ready volcano plots with enhanced coloring and labeling). For simplification, if multiple DMRs are simultaneously associated with the same gene, we choose the DMR with the maximum absolute methylation differences to represent the status of aberrant methylation of the target gene. The putative target genes of DMRs and their biological functions were determined by GREAT tools. The CpG island shore is defined as +/- 2 kb regions centred on CpG island, which is for the genomic element analysis, annotation files of GRCh38 were downloaded from Ensembl (<http://ensembl.org/>). The genomic elements including exon, intron, intergenic, and CGI regions were downloaded from the UCSC table browser, the overlap analysis between genomic elements and DMRs were calculated using software BEDTOOLS.

**Xenografts.** All procedures were performed under ethical animal licence protocols and approved by local authorities (Laboratory Animal Ethics Committee of Wenzhou Medical University). Most of the cells used for xenograft were excessively proliferating Rb-like cells that have migrated out of hRBOs and suspended in culture medium. A small number of supplementary cells for xenograft were isolated from hRBOs, which were washed with PBS and carefully trypsinized using 0.25% Trypsin-EDTA supplemented with 0.05 mg/mL DNaseI at 37 °C for 6-8 min. 2 µL of the cell suspension (50,000-80,000 cells/µL) was injected into

the subretinal space or vitreous cavity. For subretinal space or vitreous cavity injection, 6-week old immunodeficient NOD-*Prkdc*<sup>scid</sup>*IL2rg*<sup>em2</sup>/SMOC (NSG) mice (Shanghai Model Organisms) were first anaesthetized with an intraperitoneal injection of sodium pentobarbital (40 mg/kg, Sigma, P3761), and the pupils were then dilated with a drop of 2.5% phenylephrine hydrochloride solution, after which a drop of topical anaesthetic proparacaine hydrochloride (0.5%) was applied. Injections were performed using a Hamilton syringe with a 33-gauge needle under a surgical microscope. Mice were sacrificed 2 months after xenograft, and some tumor-bearing eyes were extracted for H&E staining, while the remaining eyes were kept for immunocytochemistry and TEM morphology analysis.

**Intraocular imaging.** After xenograft implantation, the development of retinal tumor was monitored by intraocular imaging using fundus photography and OCT. On the day of imaging, mice were anaesthetized with an intraperitoneal injection of sodium pentobarbital. Pupils were immediately dilated with a drop of 1% tropicamide, followed by topical application of ofloxacin eye ointment to prevent drying of the cornea. Then, fundus photography and OCT-imaging were completed using a Micron IV Retinal Imaging Microscope (Phoenix Research Labs).

**Immunocytochemistry and H&E staining.** Organoids were fixed in 4% paraformaldehyde (PFA, Beyotime, P0098) at 4°C for 60 min, embedded in NEG-50 frozen section medium (Thermo, 6502), and then cryosectioned at 12-16 µm on slides using a Leica cryostat. Sections were subjected to immunocytochemistry or storage at -80°C. Tissues were processed for cryosections using standard protocols with minor modifications (50). Briefly, tissues were dissected and post fixed in 4% PFA for 1 h followed by cryoprotection with 30% sucrose solution overnight, embedded in NEG-50, and then cryosectioned at 12-16 µm. Monolayer cells were fixed with 4% PFA for 15 min. For immunocytochemistry, sections and cells were first blocked and permeabilized in 4% BSA (Beyotime, ST023) supplemented with 0.5% Triton X-100 (Sangon, 600198-0500) for 1 h at room temperature and then stained with primary antibodies at 4°C overnight. After primary antibody staining, the sections and cells were then rinsed three times with PBS and subsequently incubated with secondary antibodies for 1 h at room temperature in the dark. After removal of the secondary antibody, the nuclei were stained with

300 nM DAPI stain solution (Thermo, D1306) for 5 min. Finally, the stained cells were visualized by confocal microscopy (Leica). For H&E staining, sections were stained with Hematoxylin and Eosin Staining Kit (Beyotime, C0105) and scanned using ZEN 2012 (blue edition) scanning system (ZEISS). Antibodies are described in [SI Appendix, Table S2](#).

**Western blot analysis.** Western blot analysis was performed conventionally. Briefly, cells were washed twice with PBS and lysed in M-PER Mammalian Protein Extraction Reagent (Thermo, 78501) containing 1× Halt Protease Inhibitor Cocktail (Thermo, 87785). Equal amounts (20-40 µg) of total protein were boiled, electrophoresed on 12% SDS-polyacrylamide gels and electroblotted onto PVDF membranes (Millipore). Membranes were blocked for 1 h with 5% fat-free milk solution or 5% BSA, probed with primary antibodies ([SI Appendix, Table S2](#)) overnight at 4°C, and then incubated with secondary antibodies at room temperature for 2 h. Images were recorded using the Li-Cor Odyssey 9120 Infrared Imaging System (LICOR).

**Transmission electron microscopy (TEM) analysis.** For TEM analysis, organoids and tissues were fixed in 2.5% EM-grade glutaraldehyde (Servicebio) for 2-4 h at 4°C, washed with 0.1 M phosphate buffer (pH 7.4), postfixed in 1% osmium tetroxide for 2-4 h at 4°C, washed and then dehydrated in an ethanol series (50-100%) to a final rinse in 100% acetone, followed by 2 h incubations in 1:1 acetone/Pon 812 (SPI) and overnight incubation in 1:2 acetone/Pon 812, The samples were embedded in Pon 812, polymerized for 48 h at 60°C, and then sectioned (60-80 nm) with a diamond knife (Daitome). Sections were stained with 2% uranyl acetate followed by lead citrate, and visualized using a HT7700 transmission electron microscope (HITACHI).

**Optical coherence tomography imaging of live organoids.** Deep optical coherence tomography (dOCT) imaging of live organoids was performed using a commercial Cell iMager Estier system

(SCREEN) according to the manufacturer's protocols. Organoids were imaged while cultured with medium in dishes placed in the device's imaging plane.

**Chemotherapeutic drug testing on human Rb organoids.** Rb organoids were generated as described above and treated with chemotherapy drugs at day 60 (stage I, early intervention) or 90 (stage II, conventional therapy). After drug treatment, organoids were collected at day 120 and then subjected to flow cytometry and immunostaining analysis. Chemotherapy drugs including vincristine (final concentration: 5 nM; Selleck, S1241), etoposide (0.5  $\mu$ M; J&K, 320523), carboplatin (10  $\mu$ M; Selleck, S1215), topotecan (10 nM; J&K, T2705), rapamycin (10  $\mu$ M; Selleck, S1039), R406 (5  $\mu$ M; Selleck, S2194) and BAY-61-3606 (5  $\mu$ M; MedChemExpress, HY-14985) were applied, and DMSO was used as the control.

**Statistical analyses.** All experiments were performed at least three times independently. The results are expressed as mean  $\pm$  SD. Data were analyzed by unpaired two-tailed Student's t-test for comparison of two groups, and by one-way ANOVA with Tukey's test or Dunnett's multiple comparisons test for comparisons of multiple groups. All analyses were performed using SPSS Statistics 19.0 software. *P*-values < 0.05 were considered significant.



**Figure S1**

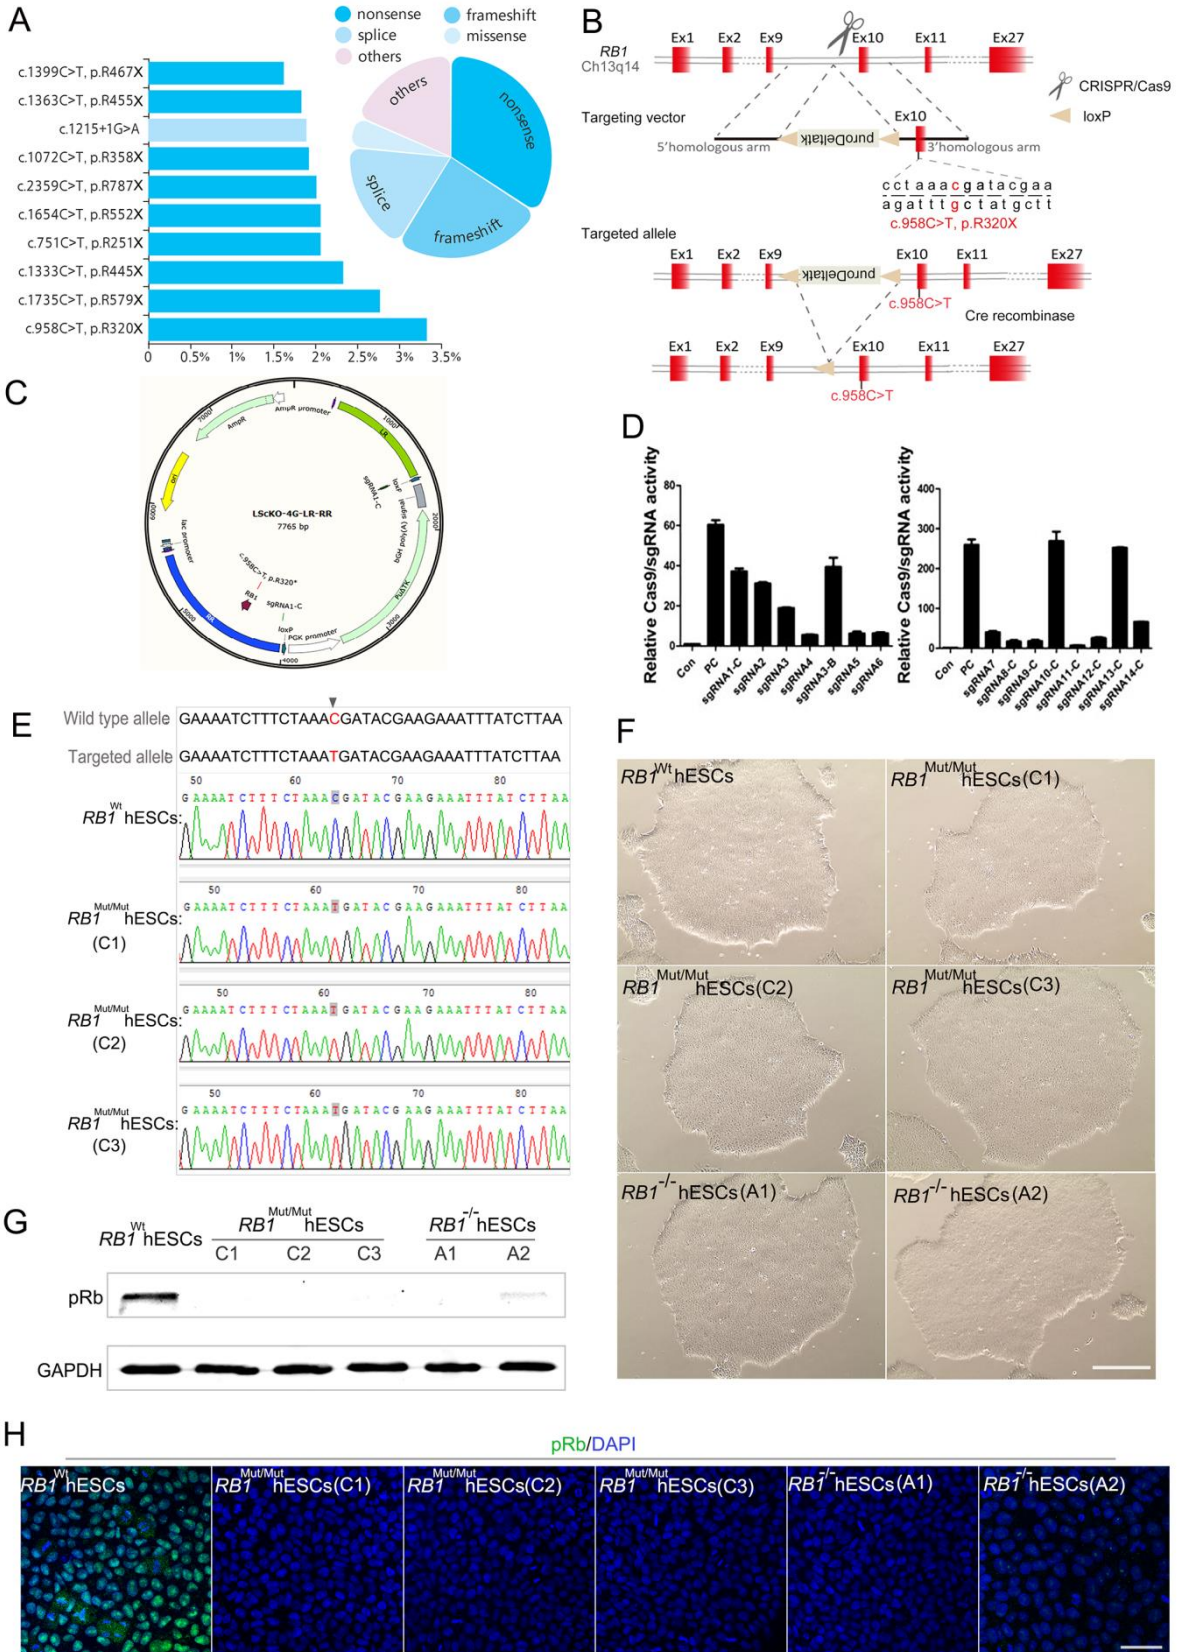

**Figure S1. Generation of  $RB1^{Mut/Mut}$  and  $RB1^{-/-}$  hESCs.** (A) Top10 of  $RB1$  point mutations in previously reported cases (left); Distribution of total  $RB1$  mutations by type (right). (B) Targeting strategy for the generation of  $RB1^{Mut/Mut}$  hESCs including mutation knock-in and resistance gene remove. (C) Sequence map for LScKO-4G- $RB1$  targeting vector. (D) Detection of CRISPR sgRNA activity. (E) Sequences of targeted loci in  $RB1^{Mut/Mut}$  hESCs. (F) Bright field images of  $RB1^{Mut/Mut}$  and  $RB1^{-/-}$  hESC colonies. Scale bar, 400  $\mu$ m. (G) Western blot analysis for expression of pRb in  $RB1^{Mut/Mut}$  and  $RB1^{-/-}$  hESCs. (H) Immunostaining analysis for pRB in  $RB1^{Mut/Mut}$  and  $RB1^{-/-}$  hESC lines. Scale bars, 50  $\mu$ m.

Figure S2

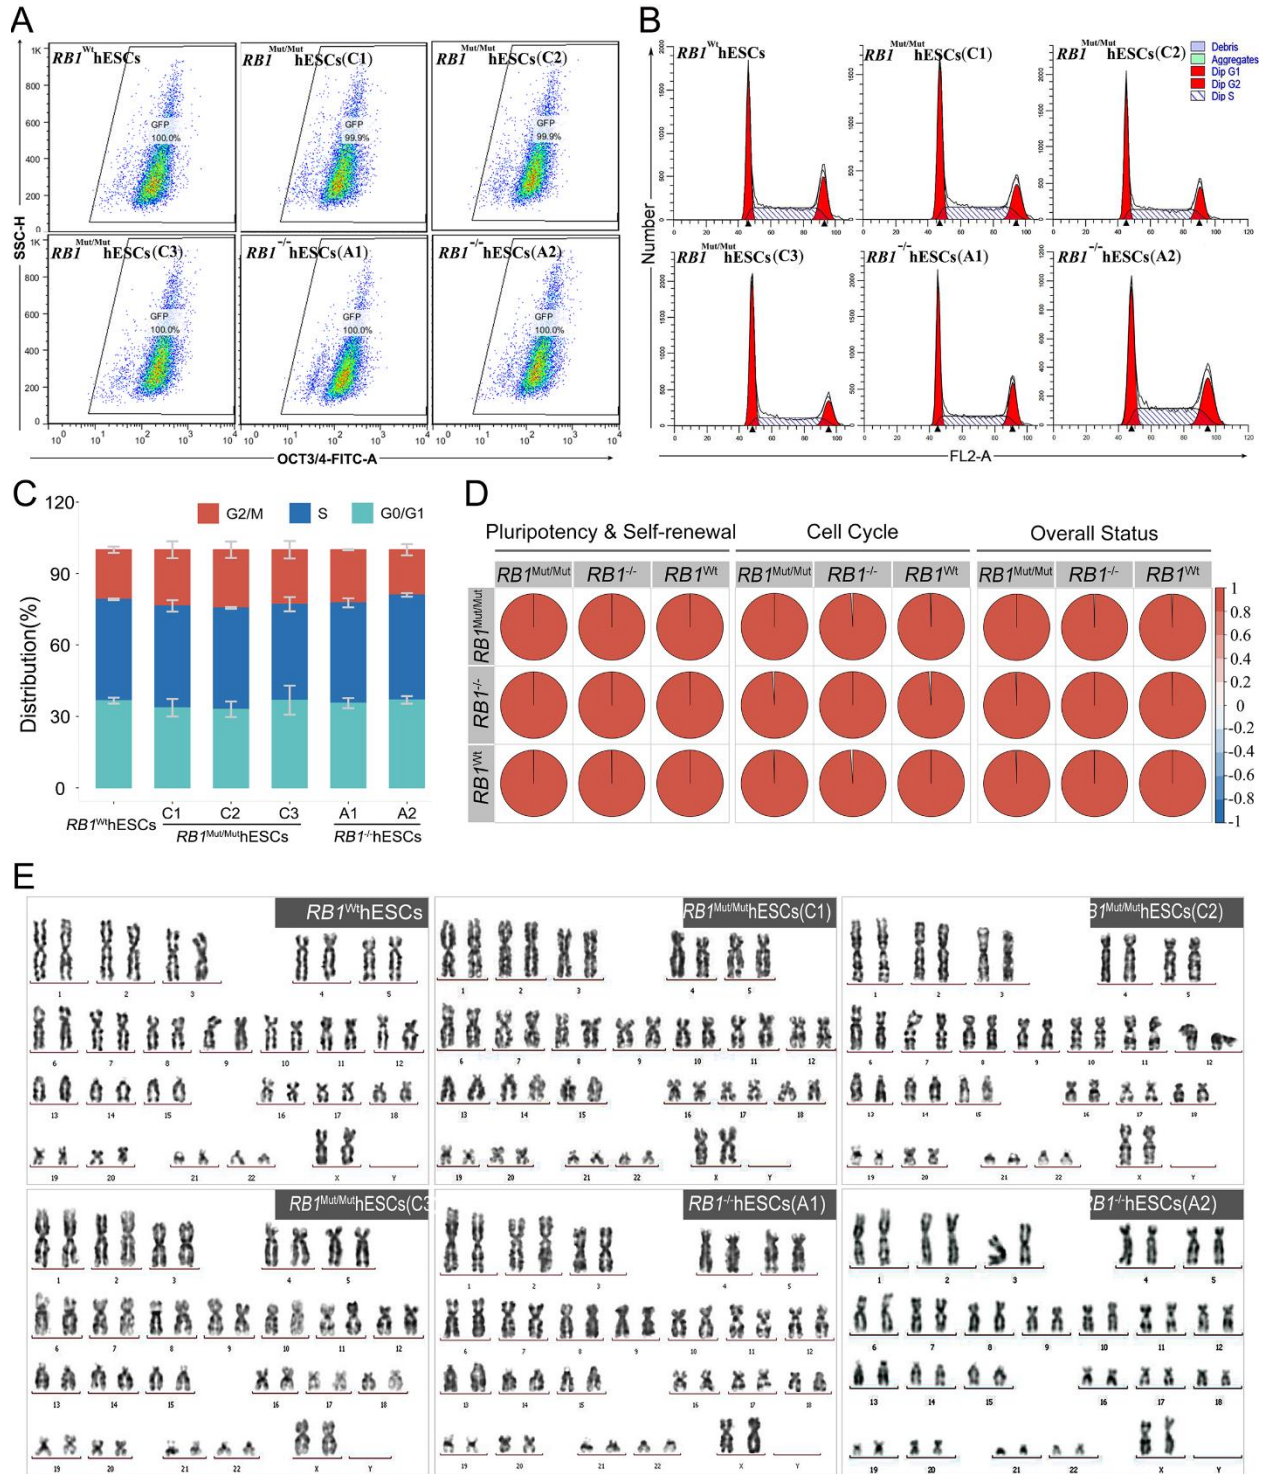

**Figure S2.  $RB1^{Mut/Mut}$  and  $RB1^{-/-}$  hESC lines sustain the primordial state.** (A) Flow cytometry analysis of OCT3/4 positive cells in  $RB1^{Mut/Mut}$ ,  $RB1^{-/-}$  and wild-type hESCs. (B) Cell cycle analysis of  $RB1^{Mut/Mut}$ ,  $RB1^{-/-}$  and wild-type hESCs. (C) Relative percentage within each cell cycle phase is represented. (D) Correlation heatmaps of the expression of pluripotency & self-renewal, cell cycle, and overall status associated genes in  $RB1^{Mut/Mut}$ ,  $RB1^{-/-}$  and wild-type hESCs base on RNA-Seq data. (E) Karyotype analysis of  $RB1^{Mut/Mut}$ ,  $RB1^{-/-}$  and wild-type hESCs.

**Figure S3**

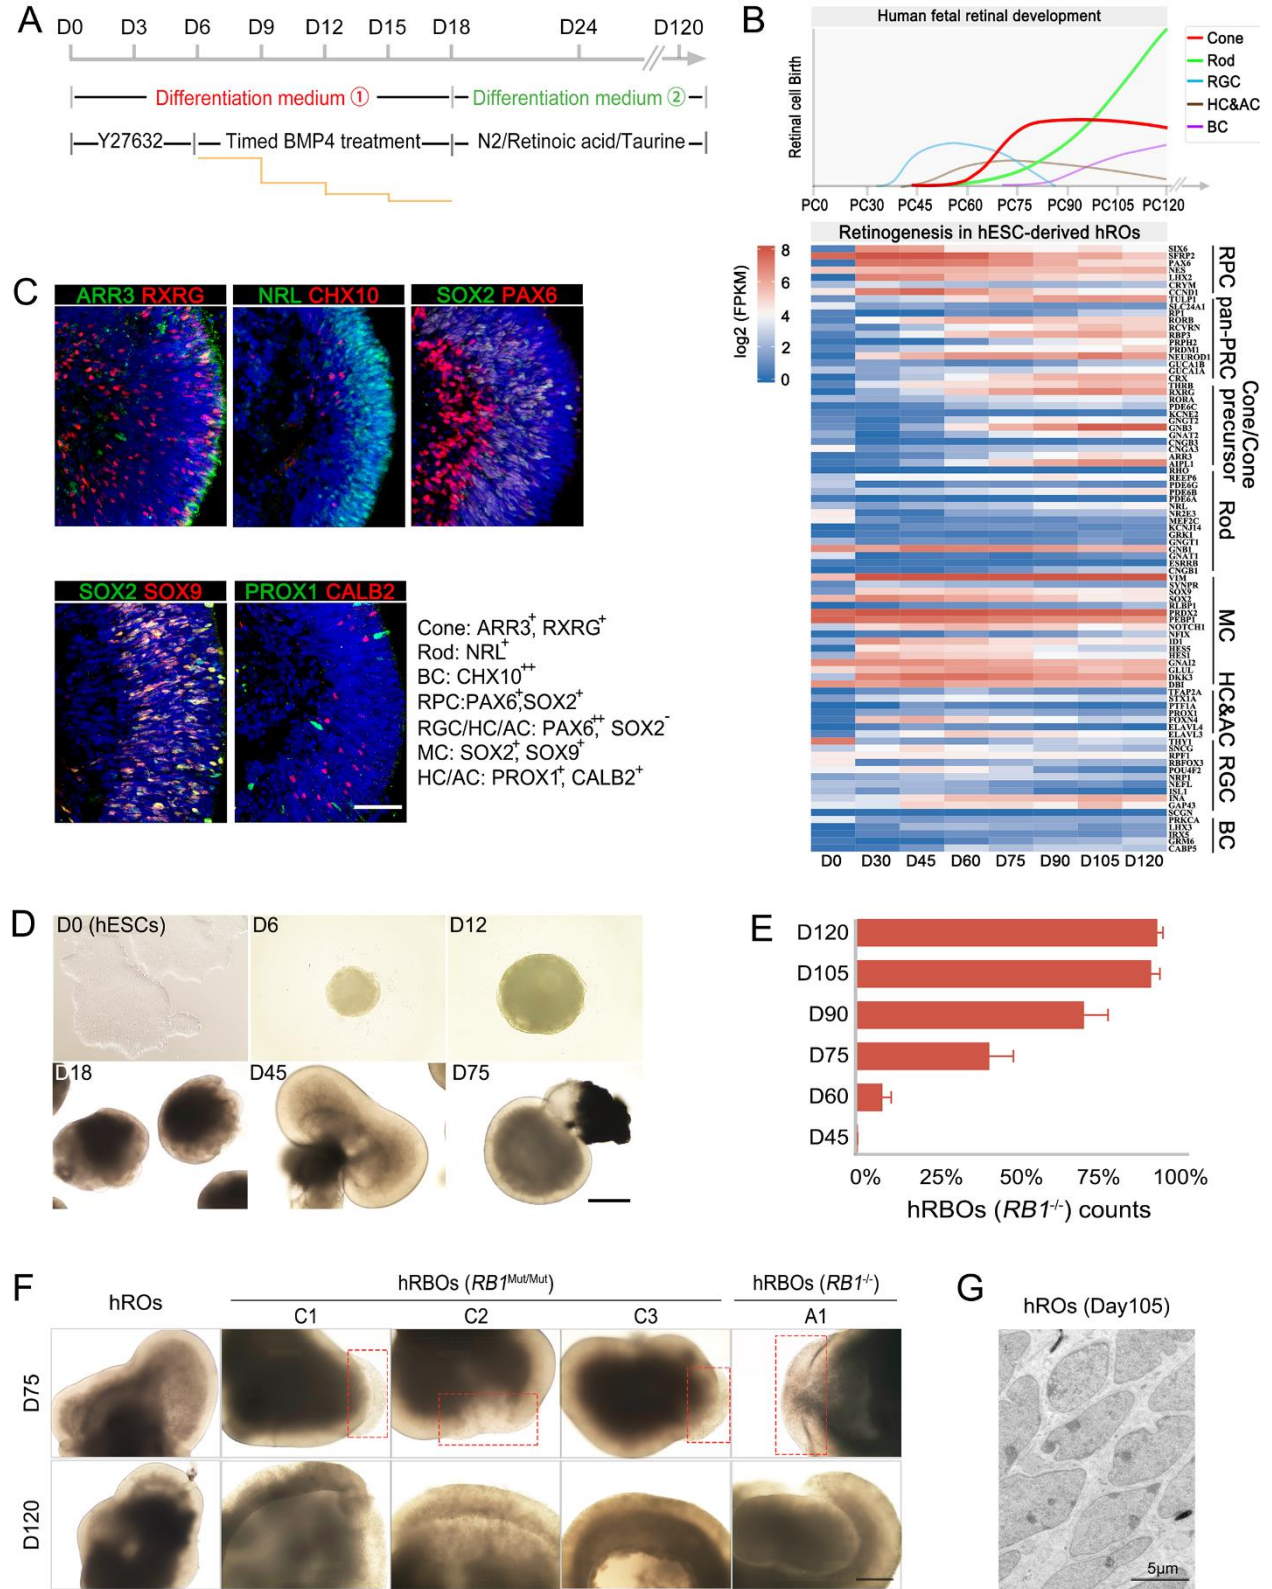

**Figure S3. Development of  $RB1^{Mut/Mut}$  and  $RB1^{-/-}$  hESC-derived hRBOs.** (A) Stepwise culture strategy of retinal organoids derived from hESCs. (B) Retinal cell genesis at different organoid stages in hESC-derived hROs (bottom row); the relative numbers and developmental birth order of each retinal cell types *in vivo* are shown (top row) (26, 27). (C) Immunostaining of retinal cell type-specific proteins in day 105 hROs. Scale bar, 50  $\mu\text{m}$ . (D) Representative bright-field images of hESC-derived hROs in different differentiation stages. Scale bar, 400  $\mu\text{m}$ . (E) Quantification of  $RB1^{-/-}$  hESC-derived organoids with tumor-like structures in different organoid stages. (F) Representative bright-field images of developing  $RB1^{Mut/Mut}$  and  $RB1^{-/-}$  hESC-derived hRBOs at day 75 and 120. Wild-type hESC-derived hROs were used as the control. Dashed lines denote the tumor-like structures. Scale bar, 400  $\mu\text{m}$ . (G) Transmission electron micrograph of cells from day 105 hESC-derived normal hROs. Scale bar, 5  $\mu\text{m}$ .

Figure S4

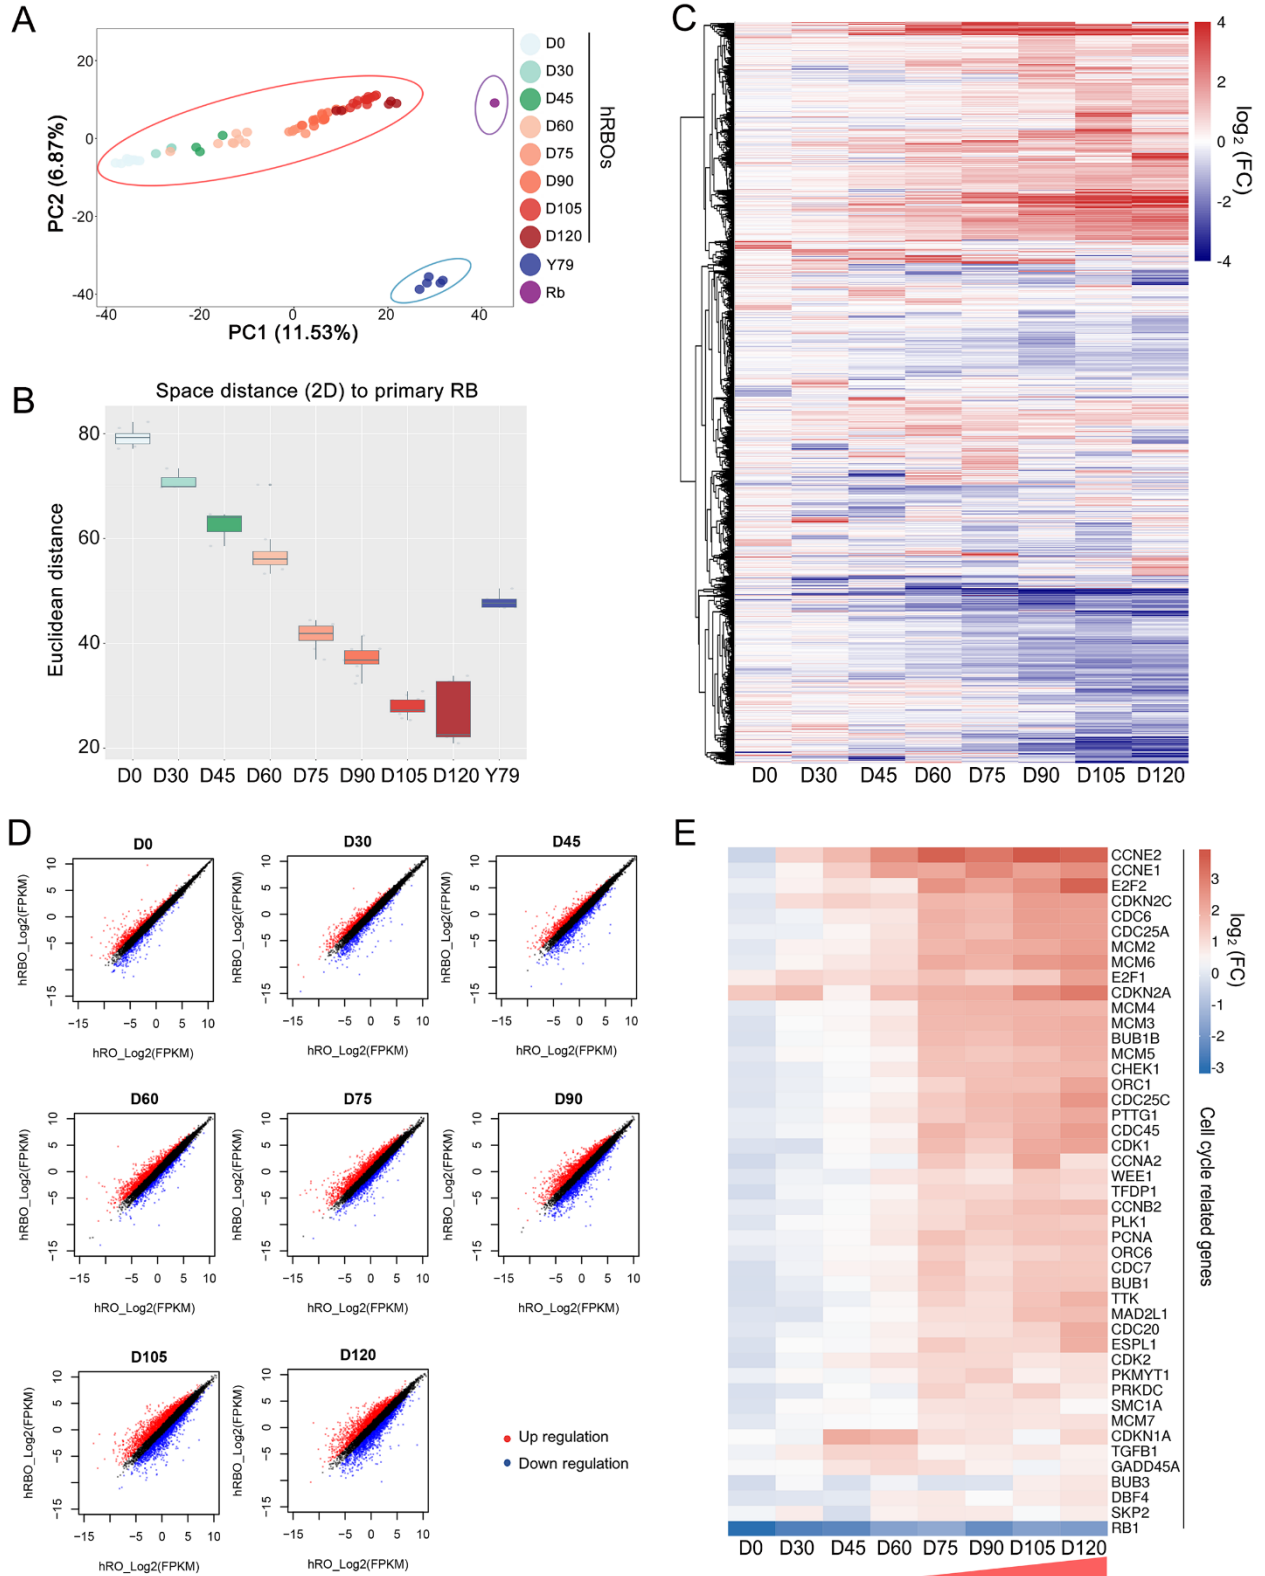

**Figure S4. Molecular characterization of hRBOs.** (A) Principal-component analysis (PCA) of hRBOs at different organoid stages, Y79 cell line, and human primary Rb based on the expression of indicated genes correspond with those in Fig. 2A. Euclidean distance measurement between each sample and primary Rb in 2D PCA plot were also shown in (B). (C) Heatmap of all differentially expressed genes (FC>2) between the hRBOs and normal hROs across different organoid stages (days 0-120). (D) Scatterplots show the expressional alterations of all genes between the hRBOs and normal hROs at different organoid stages. The red and blue points represent the up- and down-regulated genes, respectively. (E) Heatmap showing the average log<sub>2</sub>-fold difference in the cell cycle related genes between the hRBOs and control hROs at different organoid stages.



**Figure S5**

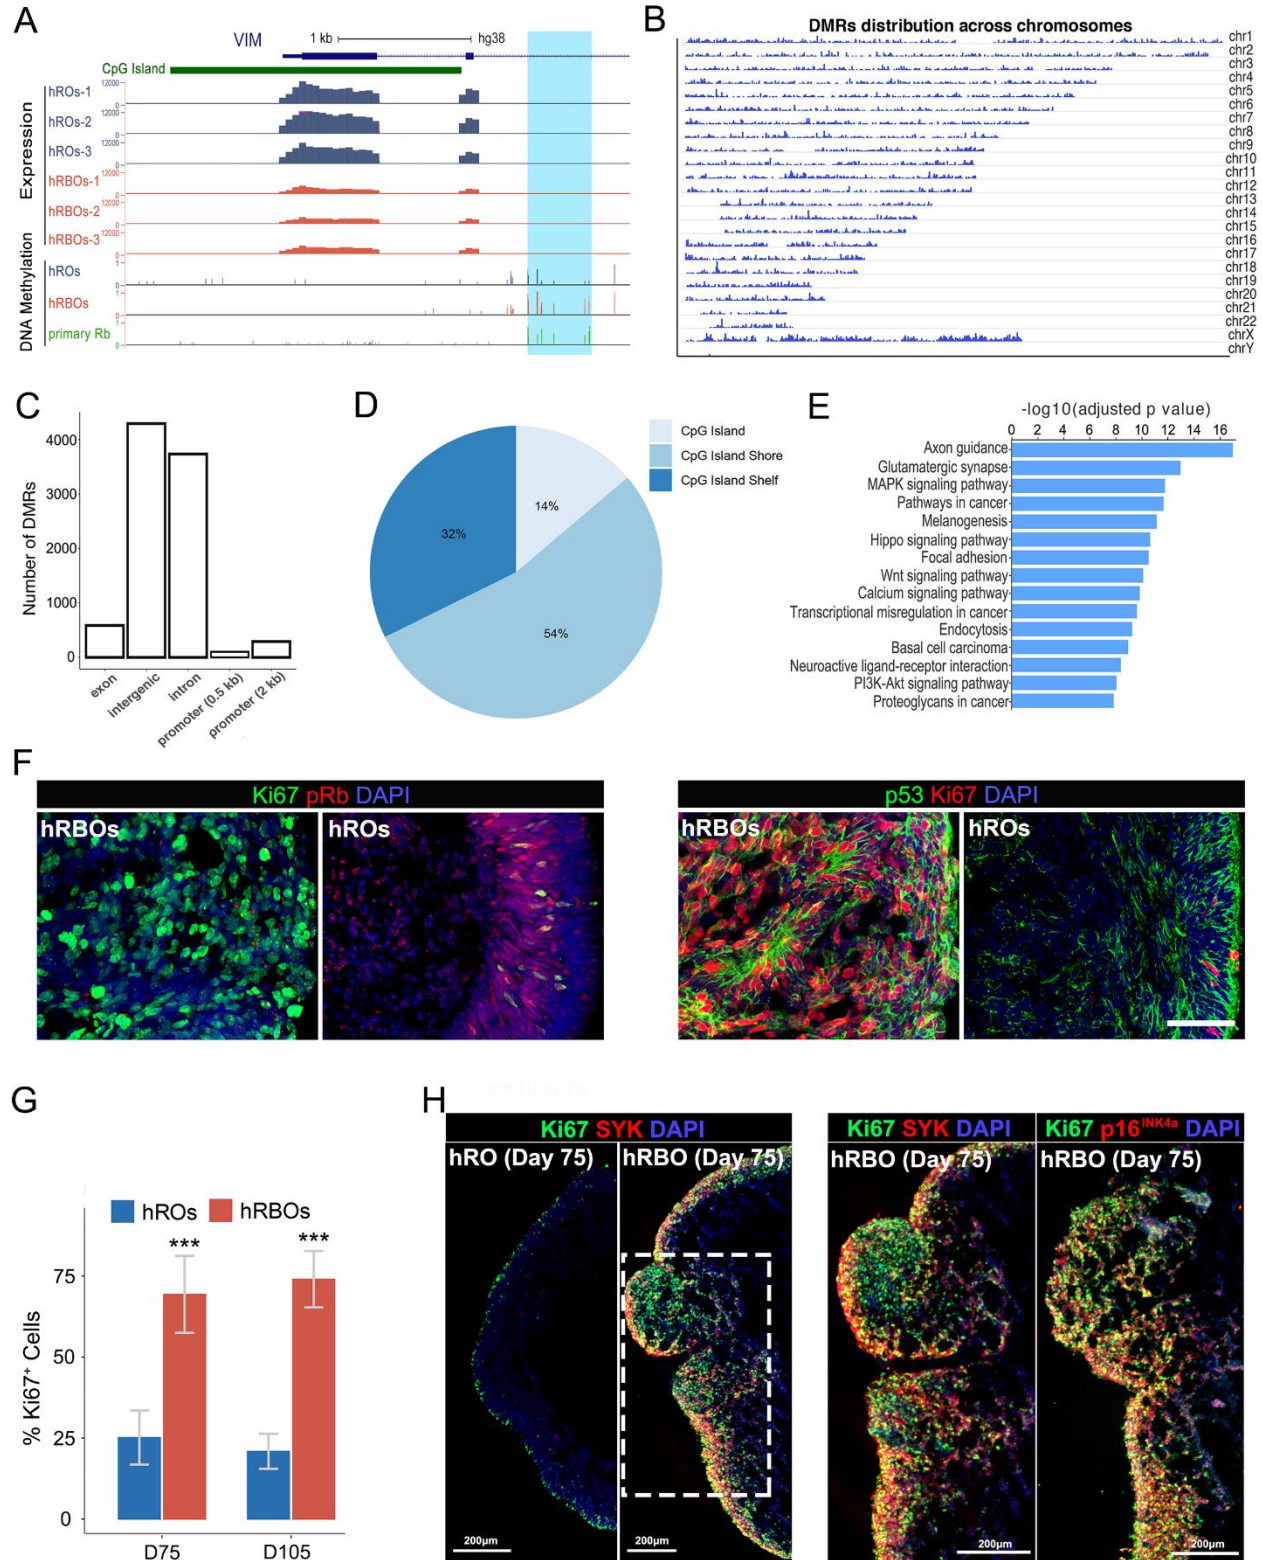

**Figure S5. Tumorigenesis identification in hRBOs.** (A) Genomic snapshots of RNA-seq and WGBS for *VIM* (a known low-expressed gene in primary Rb) in hRBOs and control hROs. Representative methylation level of *VIM* from human primary Rb sample is also shown. Enlarged view of the specific site is shown below. (B) The DMRs distribution across different chromosomes. (C) The overlap analysis between DRMs and different genomic elements. (D) The pie chart shows the distribution of DMRs against CGI, CGI shore, and CGI shelf. (E) KEGG analysis of DMRs associated genes and 15 significant pathways were showed. (F) Co-immunostaining of pRb and p53 with the proliferative marker Ki67 in day 105 hRBOs and control hROs. Scale bar, 50  $\mu\text{m}$ . (G) Quantification of Ki67<sup>+</sup> cells in hROs and hRBOs at day 75 and 105 as analyzed by immunostaining. (H) Immunostaining of Rb signature genes Ki67 and SYK in hRBOs and hROs at day 75 (left). Co-immunostaining of Ki67 with SYK and p16<sup>INK4a</sup> and ARR3 in hRBOs at day 75 (right). Dashed lines denote the tumor-like structures. Scale bar, 200  $\mu\text{m}$ .

**Figure S6**

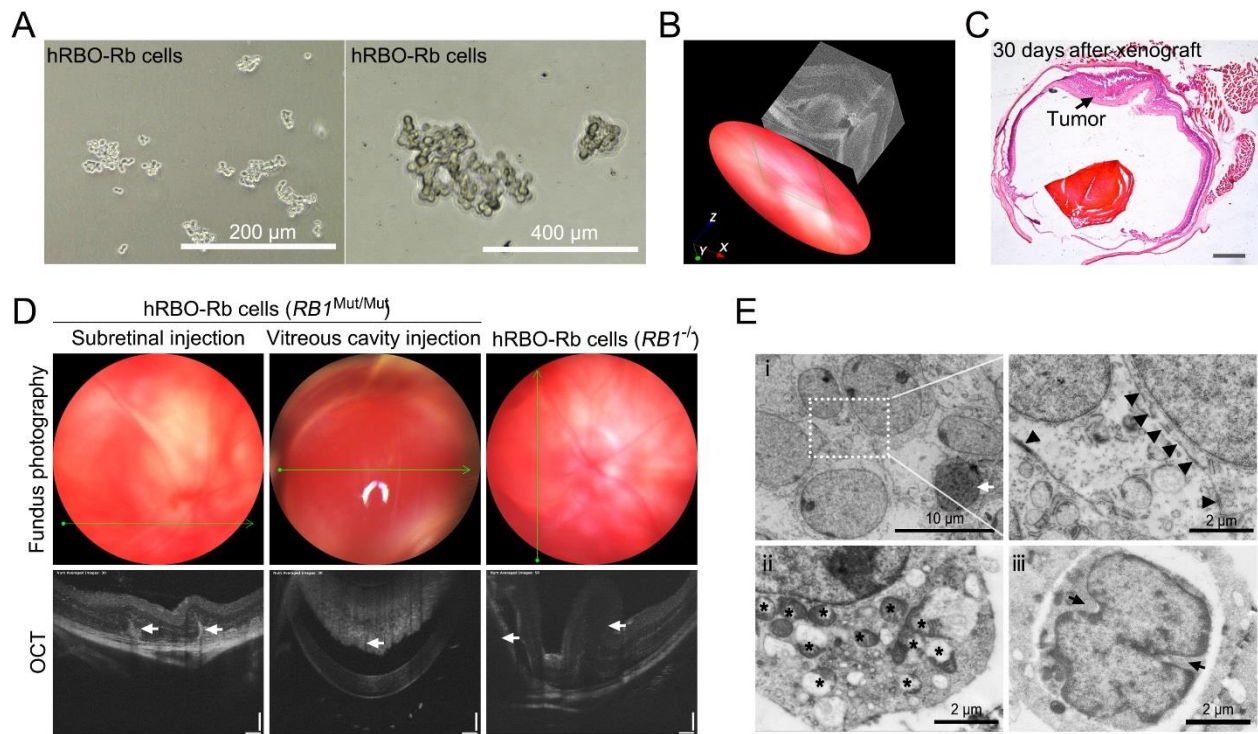

**Figure S6. High tumorigenicity of hRBOs *in vivo*.** (A) Representative bright-field image of hRBO-derived Rb cells cultured in suspension conditions. (B) Representative 3D imaging of Rb engraftments by OCT. (C) Representative H&E staining of hRBO-Rb cells engrafted eyes one month after subretinal injection. Scale bars, 200  $\mu\text{m}$ . (D) Ophthalmic examination of mouse eyes after subretinal (left) or vitreous (middle) engraftment of  $RB1^{Mut/Mut}$  or  $RB1^{-/-}$  hRBO-Rb cells (right). Arrows indicate the viable Rb engraftments. (E) Representative transmission electron micrograph of Rb engraftments. (i) White arrow indicates a mitotic figure; Arrowheads indicate the structure of tight junction. Magnified view of the boxed region is shown in right. Abundant mitochondria (asterisks) and mitotically proliferating cell (black arrows) are shown in (ii) and (iii), respectively.

**Figure S7**

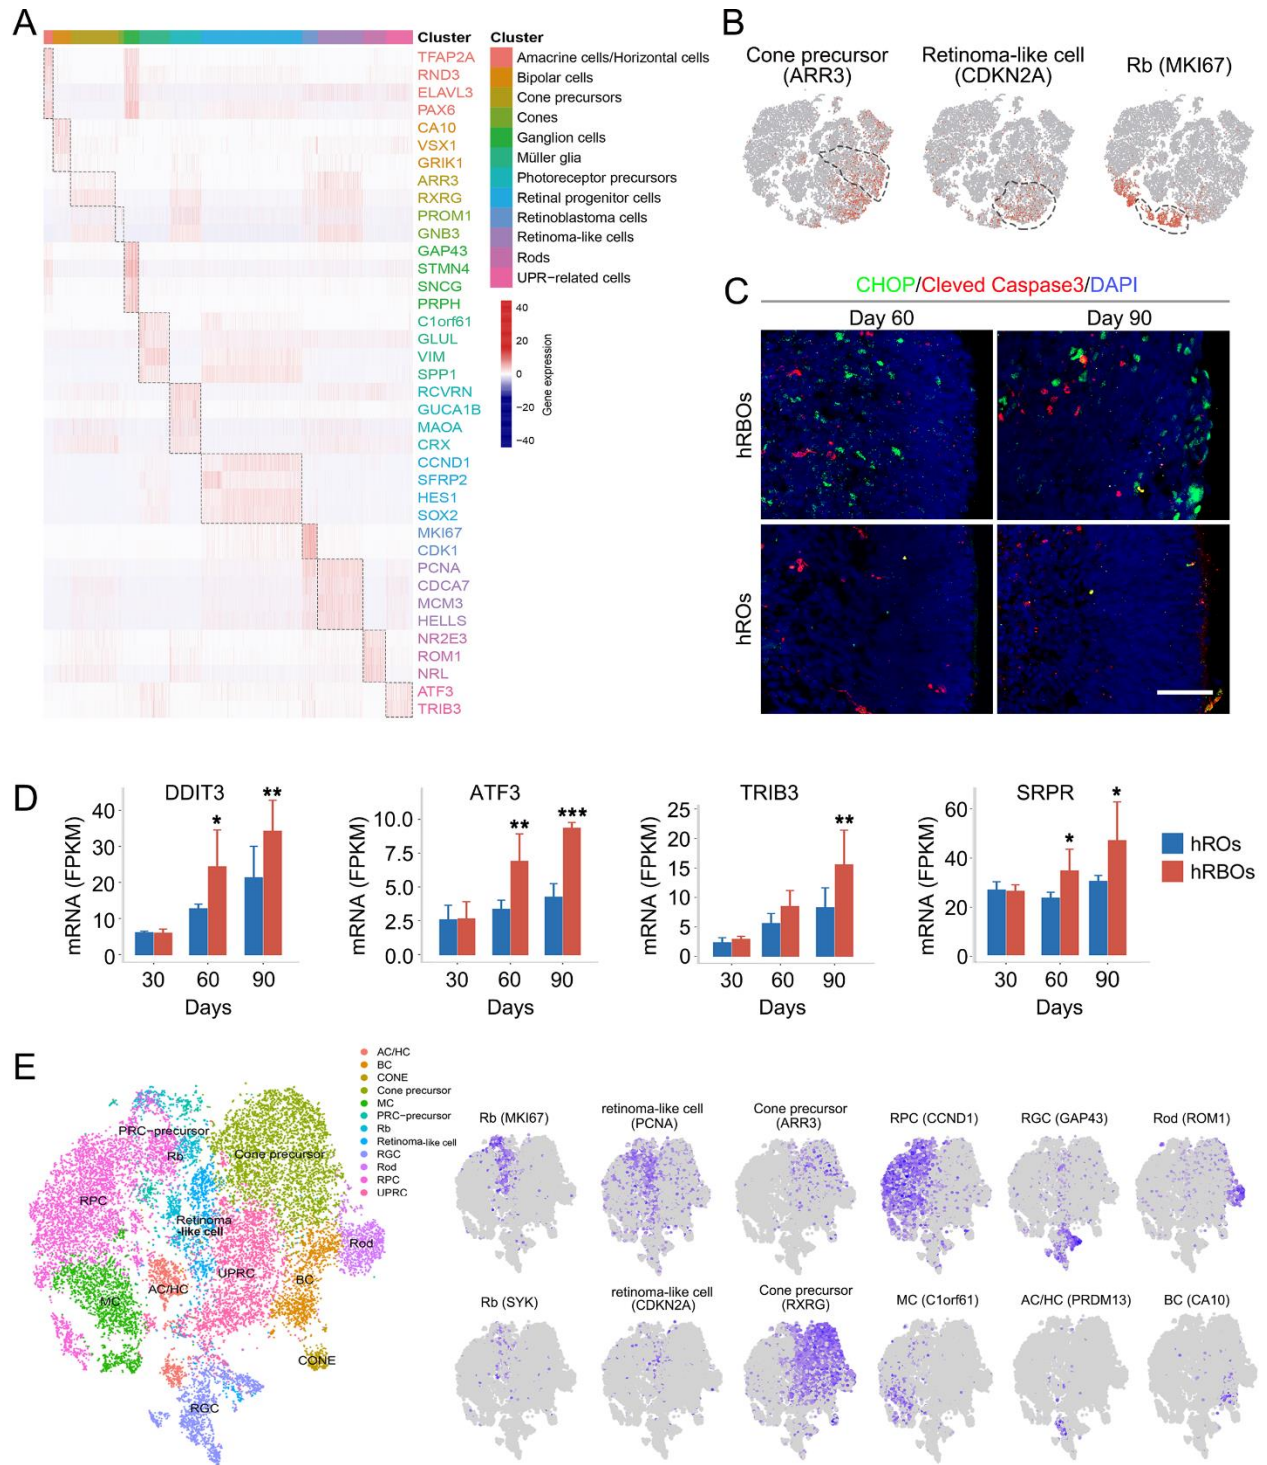

**Figure S7. Single-cell transcriptomes from hRBOs reveal the cellular identity of Rb.** (A) Heatmap shows the expression of key cell type-signature genes in each cell cluster. (B) Expression of representative marker gene for the cone precursor (*ARR3*), retinoma-like (*CDKN2A*) and Rb (*MKI67*) cell clusters on the tSNE map. Dashed lines denote the corresponding cell clusters. (C) Co-immunostaining of UPR related protein CHOP with the apoptosis marker cleaved caspase 3 in hRBOs and control hROs at day60 and 90. Scale bars, 50  $\mu$ m. (D) Bar graphs showing the expression of UPR related genes, *DDIT3* (CHOP), *ATF3*, *TRIB3*, and *SRPR*, in hRBOs and control hROs. Data are shown as mean FPKM $\pm$ SD from RNA-Seq data. (E) Single-cell RNA-seq analysis of hRBO and hRO after regressing out cell cycle scores. tSNE visualization of cells in 90-day-old hRBOs and control hROs profiled with each cell colored according to cell type annotations (left). Expression of marker genes for the main cell clusters on the tSNE map (right).

Figure S8

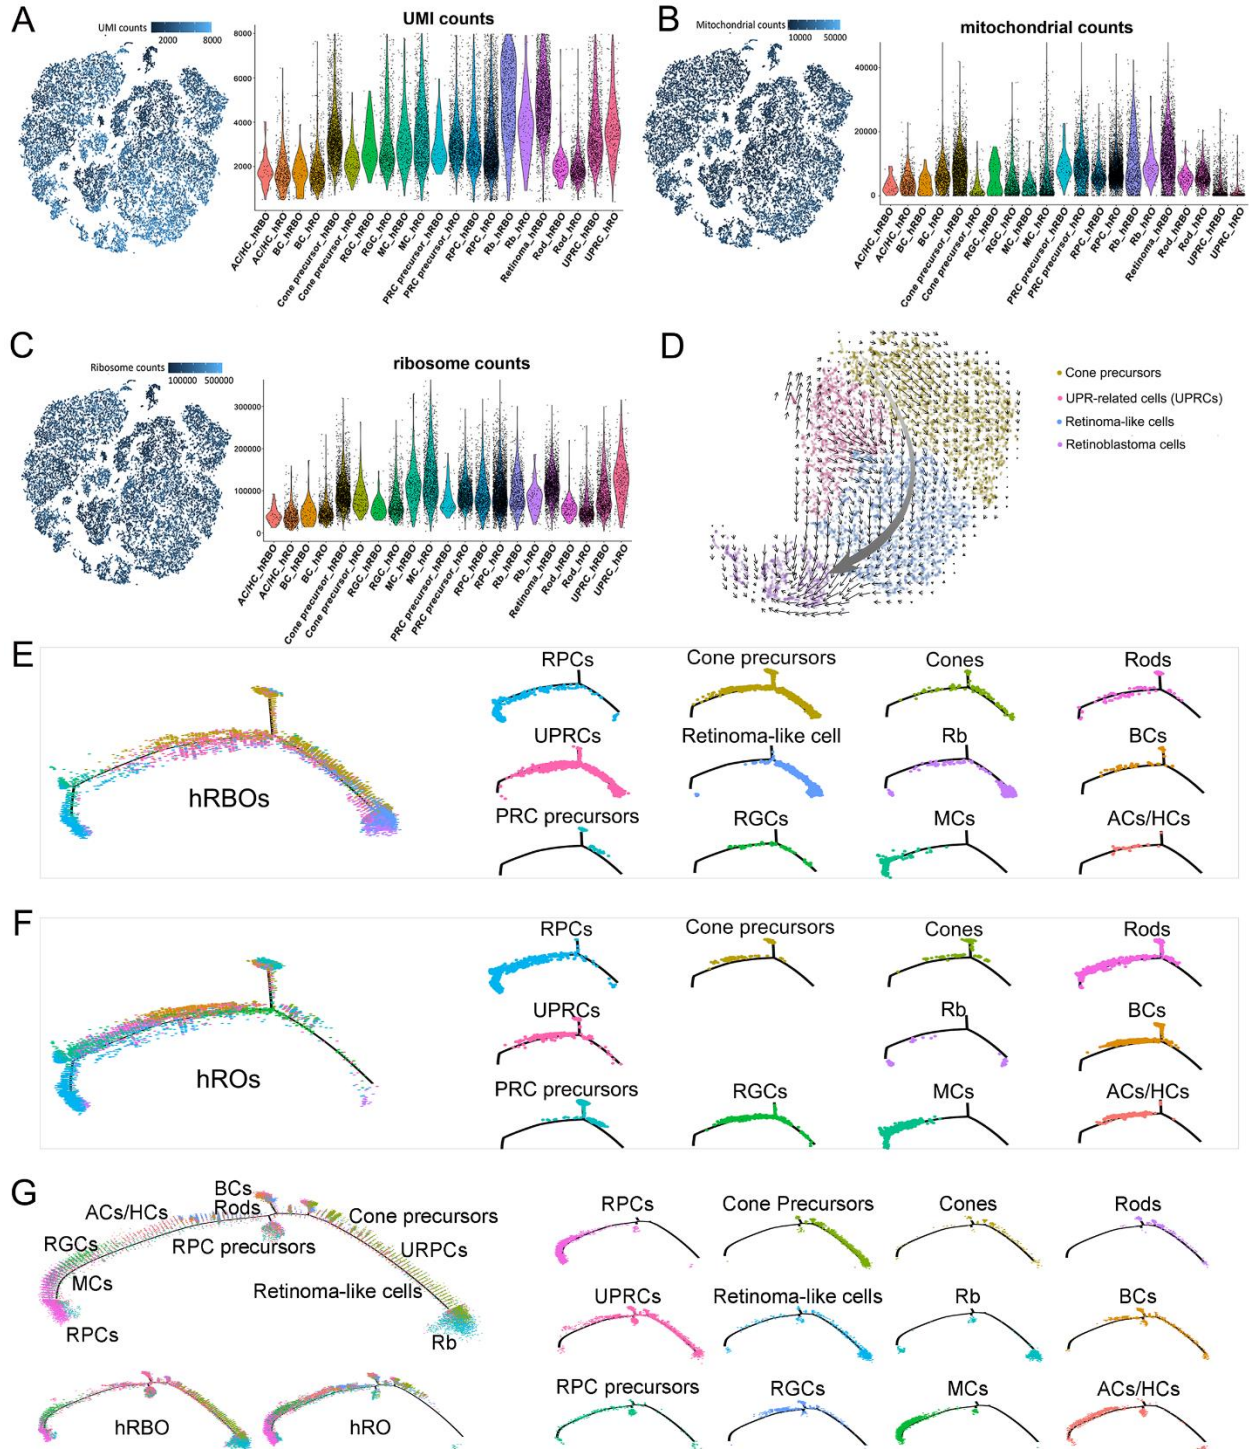

**Figure S8. Trajectory analysis of single cells in hRBOs and control hROs.** (A-C) Quality control for Single-cell RNA-seq analysis. Heat and violin plot of UMI (A), mitochondrial (B) and ribosome (C) counts for each sample. (D) RNA Velocity analysis showing the origin of Rb cells and inter-relationship of four main populations in hRBOs. The velocities are visualized on the pre-defined t-SNE plot from the Figure 4A. (E, F) Single-cell pseudotime trajectory analysis of each cell type from hRBOs and control hROs. (G) Single-cell pseudotime trajectory analysis of each cell type from hRBOs and control hROs after regressing out cell cycle scores.

**Figure S9**

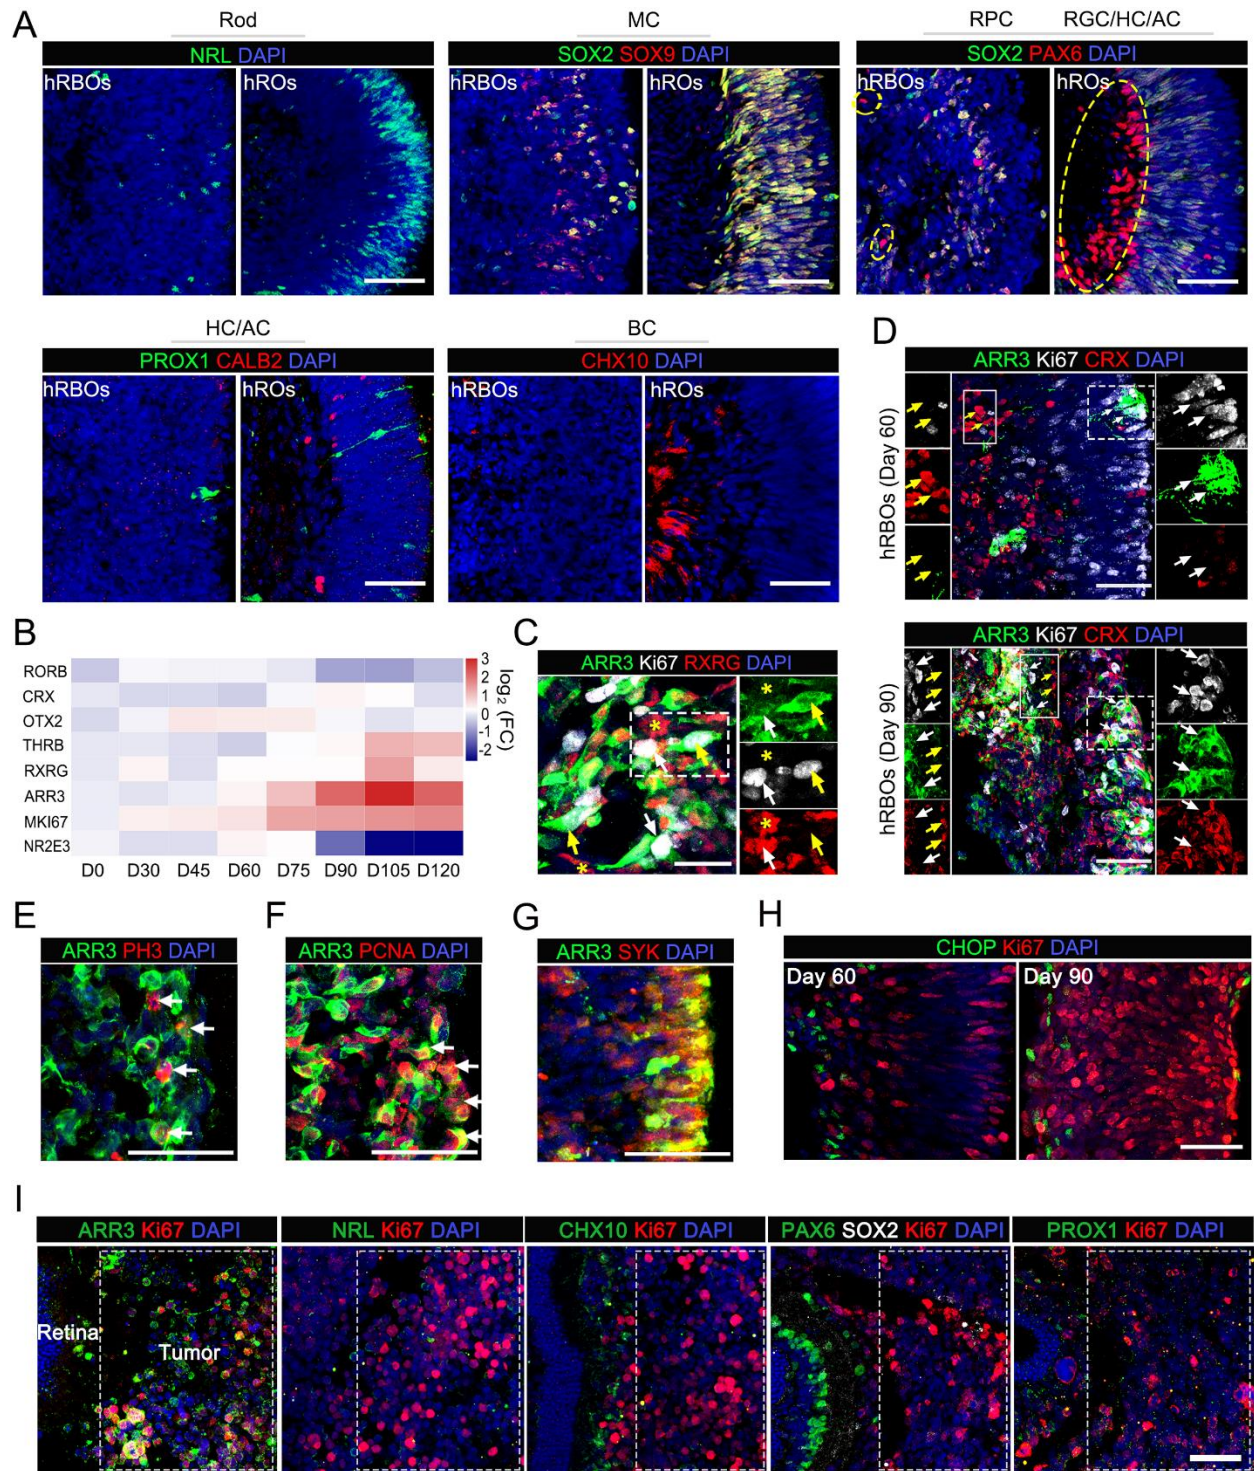



**Figure S9. Rb in hRBOs originating from maturing cone precursor.** (A) Immunostaining of rod marker NRL, Müller cell markers SOX2/SOX9, retinal progenitor cell markers SOX2/PAX6, horizontal/amacrine cell markers PROX1, CALB2 and bipolar cell marker CHX10 in hRBOs and hROs at day 105. Scale bar, 50  $\mu\text{m}$ . (B) Heatmap showing the average log<sub>2</sub>-fold difference of genes specific for proliferative cells (*MKI67*), early/immature photoreceptor precursors (*THRB* and *RXRG* for cone; *CRX* and *RORB* for cone or rod), retinal progenitors (*OTX2*); *NR2E3* for rod and maturing cone precursors (*ARR3*). (C) Co-immunostaining of maturing cone precursor marker *ARR3* with pan-cone precursor marker *RXRG* and proliferative marker *Ki67* in 90-day-old hRBOs. White arrows indicate *ARR3*<sup>+</sup>/*RXRG*<sup>+</sup>/*Ki67*<sup>+</sup> maturing cone precursors. Yellow arrows indicate *ARR3*<sup>+</sup>/*RXRG*<sup>-</sup>/*Ki67*<sup>+</sup> maturing cone precursors. Asterisks indicate *ARR3*<sup>-</sup>/*RXRG*<sup>+</sup>/*Ki67*<sup>-</sup> cone precursors. Scale bar, 50  $\mu\text{m}$ . (D) Co-immunostaining of maturing cone precursor marker *ARR3* with early photoreceptor precursor marker *CRX* and proliferative marker *Ki67* in 60- and 90-day-old hRBOs. Magnified views of the boxed regions are shown. White arrows indicate *ARR3*<sup>+</sup>/*Ki67*<sup>+</sup> maturing cone precursors. Yellow arrows indicate *ARR3*<sup>-</sup>/*Ki67*<sup>-</sup>/*CRX*<sup>+</sup> early photoreceptor precursors. Scale bar, 50  $\mu\text{m}$ . (E-G) Co-immunostaining of *ARR3* with pH3 (E) PCNA (F) and SYK (G) in hRBOs at day 105. Arrows indicate cells co-expressing *ARR3* and pH3 (D) or PCNA (E). Scale bars, 50  $\mu\text{m}$ . (H) Co-immunostaining of UPR related protein CHOP with *Ki67* in hRBOs at day 60 and 90. Scale bars, 50  $\mu\text{m}$ . (I) Co-immunostaining of *Ki67* with maturing cone precursor marker *ARR3*, rod marker NRL, bipolar cell marker CHX10, retinal progenitor cell markers SOX2/PAX6, horizontal cell markers PROX1 in the hRBO-derived intraocular tumors (2 months after subretinal injection). Dashed lines denote the tumor foci. Scale bar, 50  $\mu\text{m}$ .

**Figure S10**

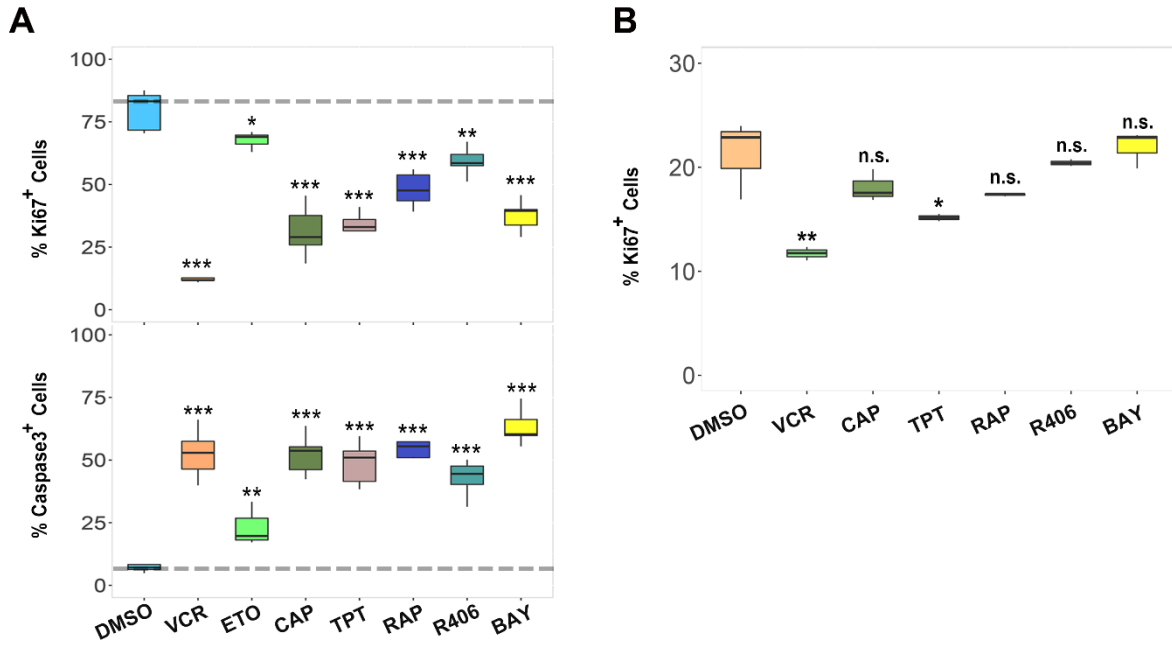

**Figure S10. Chemotherapeutic drug responses of hRBOs.** (A) Quantification of the percentage of Ki67<sup>+</sup> (Top) and CC3<sup>+</sup> (Bottom) cells from hRBOs after drug treatments with the indicated drugs as analyzed by immunostaining in Figure 6d. Mean  $\pm$  SD is shown.  $n = 5$ ; \* $P < 0.05$ , \*\* $P < 0.01$ , \*\*\* $P < 0.001$ . (B) Safety testing of six effective drugs in normal hROs. FACS quantification of the percentage of Ki67<sup>+</sup> cells from hROs after the indicated treatments. Mean  $\pm$  SD is shown,  $n=5$ , \*\* $P < 0.01$ , \*\*\* $P < 0.001$ ; Statistical analysis was done by one-way ANOVA with Dunnett's test.

**Table S1**

| <b>5'Guide</b>                | <b>Score</b> | <b>Sequences (5'-3')</b> |
|-------------------------------|--------------|--------------------------|
| <b>Guide 1<sup>#</sup>-C</b>  | 65           | AGGAAAGTTGCTTGAACCCC GGG |
| <b>Guide 2<sup>#</sup></b>    | 70           | ATAGCCAATCAATAGATGAC TGG |
| <b>Guide 3<sup>#</sup></b>    | 66           | CTCTGAGGTTGGAATCACTT TGG |
| <b>Guide 4<sup>#</sup></b>    | 66           | GCGTTAAAAGTCACAGTAGA AGG |
| <b>Guide 3<sup>#</sup>-B</b>  | 60           | TTCATTAAGGTTGGGATACA GGG |
| <b>Guide 5<sup>#</sup></b>    | 80           | ACTTGTTATCAATACCACC AGG  |
| <b>Guide 6<sup>#</sup></b>    | 77           | TTCATATACTATTGCCTGCC TGG |
| <b>Guide 7<sup>#</sup></b>    | 70           | GGCAGGCAATAGTATATGAA AGG |
| <b>Guide 8<sup>#</sup>-C</b>  | 53           | CTTTTAAACTGAACAAC TGG    |
| <b>Guide 9<sup>#</sup>-C</b>  | 52           | CTTTTTAAATAAACCAGGC AGG  |
| <b>Guide 10<sup>#</sup>-C</b> | 51           | GTCAGATGCTTTCTCCCTGG TGG |
| <b>Guide 11<sup>#</sup></b>   | 50           | CCTCTTGTGATAAACATAA TGG  |
| <b>Guide 12<sup>#</sup>-C</b> | 50           | CCATTATGTTTATGACAAAG AGG |
| <b>Guide 13<sup>#</sup>-C</b> | 49           | AAAGTCAGATGCTTTCTCCC TGG |
| <b>Guide 14<sup>#</sup>-C</b> | 36           | GTAGAAACCTAAAATTGGAA TGG |

**Table S1. sgRNAs targeting *RB1*.**

**Table S2**

| <b>Antibodies</b>                                | <b>Source</b>             | <b>Identifier</b> |
|--------------------------------------------------|---------------------------|-------------------|
| Anti-Arrestin 3                                  | Novus Biologicals         | Cat# NBP1-37003   |
| Anti-ARR3                                        | Sigma-Aldrich             | Cat# HPA063129    |
| Anti-RXR $\gamma$ (A-2)                          | Santa Cruz Biotechnology  | Cat# sc-365252    |
| Anti-Nrl (F-2)                                   | Santa Cruz Biotechnology  | Cat# sc-374277    |
| Anti-CHX10                                       | Novus Biologicals         | Cat# NBP1-84476   |
| Anti-Sox-2 (E-4)                                 | Santa Cruz Biotechnology  | Cat# sc-365823    |
| Anti-SOX9 [EPR14335-78]                          | Abcam                     | Cat# ab185966     |
| Anti-Pax-6                                       | Biolegend                 | Cat# 901301       |
| Anti-Calbindin (D-4)                             | Santa Cruz Biotechnology  | Cat# sc-365360    |
| Anti-Prox 1                                      | Sigma-Aldrich             | Cat# AB5475       |
| Anti-Calretinin (H-5)                            | Santa Cruz Biotechnology  | Cat# sc-365956    |
| Anti-Nestin (NES)                                | BOSTER                    | Cat# BA1289       |
| Anti-Cleaved Caspase3 (Asp175)                   | Cell Signaling Technology | Cat# 9664         |
| Anti-Caspase3 (active form)                      | Millipore                 | Cat# MAB10753     |
| Anti-Ki67 antibody                               | Abcam                     | Cat# ab15580      |
| Anti-Ki-67 Clone B56 (RUO)                       | BD Biosciences            | Cat# 556003       |
| Alexa Fluor 488 Mouse anti-Oct3/4 Clone 40/Oct-3 | BD Biosciences            | Cat# 560253       |
| Alexa Fluor 647 Mouse anti-Ki-67 Clone B56       | BD Biosciences            | Cat# 558615       |
| Purified Mouse Anti-Human DEK Clone 2/DEK        | BD Biosciences            | Cat# 610948       |
| Anti-CDKN2A/p16INK4a                             | Abcam                     | Cat# ab108349     |
| Anti-Syk (D3Z1E)                                 | Cell Signaling Technology | Cat# 13198        |
| Anti-Syk (4D10)                                  | Santa Cruz Biotechnology  | Cat# sc-1240      |
| Anti-NSE antibody [EPR3377]                      | Abcam                     | Cat# ab79757      |
| Anti-Rb antibody [EPR17512]                      | Abcam                     | Cat# ab181616     |
| Anti-p53 (DO-1)                                  | Santa Cruz Biotechnology  | Cat# sc-126       |

|                                                                          |                           |                        |
|--------------------------------------------------------------------------|---------------------------|------------------------|
| Anti-Phospho-Histone H3 (Ser10)                                          | Cell Signaling Technology | Cat# 9701              |
| Anti-PCNA (PC10)                                                         | Santa Cruz Biotechnology  | Cat# sc-56             |
| Anti-CHOP (L63F7)                                                        | Cell Signaling Technology | Cat# 2895              |
| Anti-CRX (M02)                                                           | Abnove                    | Cat# ABN-H00001406-M02 |
| Anti-GAPDH                                                               | Abcam                     | Cat# ab181602          |
| DAPI                                                                     | Thermo Fisher Scientific  | Cat# D1306             |
| Donkey anti-Goat IgG (H+L) Secondary Antibody, Alexa Fluor Plus 488      | Thermo Fisher Scientific  | Cat# A32814            |
| Goat anti-Mouse IgG (H+L) Secondary Antibody, Alexa Fluor Plus 488       | Thermo Fisher Scientific  | Cat# A32723            |
| Alexa Fluor 594 AffiniPure Donkey Anti-Mouse IgG (H+L)                   | Jackson ImmunoResearch    | Cat# 715-585-151       |
| Donkey anti-Rabbit IgG (H+L) Secondary Antibody, Alexa Fluor 594         | Thermo Fisher Scientific  | Cat# A-21207           |
| Donkey anti-Goat IgG (H+L) Secondary Antibody, Alexa Fluor 555 conjugate | Thermo Fisher Scientific  | Cat# A-21432           |
| IRDye 800CW Goat anti-Mouse IgG Secondary Antibody                       | LI-COR                    | Cat# 926-32210         |
| IRDye 800CW Goat anti-Rabbit IgG Secondary Antibody                      | LI-COR                    | Cat# 926-32211         |

**Table S2. Antibodies used in this study.**

**Movie S1. Abnormal proliferation of RB1 mutant hESC-derived hRBOs (days 65-70).**

**Movie S2. dOCT movie of 105-day-old hRBO.**

**Movie S3. dOCT movie of 105-day-old hRO.**
